# Supplementary material for: Intestinal Immunomodulation and Shifts on the Gut Microbiota of BALB/c Mice Promoted by TwoBifidobacteriumandLactobacillusStrains Isolated from Human Samples
Source: Hindawi journal article supplement (doi:10.1155/2019/2323540), 2019-04-18
Supplement: f1 [file 2323540.f1.pdf]

## Supplementary Material

**Table S1.** Relative abundance of different intestinal microbial groups, calculated as a percentage (mean  $\pm$  standard deviation) of the total microbial counts, at time 0 and after eight days of daily administration of *B. animalis* subsp. *lactis* IPLA 20020 (fresh culture or lyophilized) or *L. gasseri* IPLA 20212 (fresh culture), and a placebo (control) to adult BALB/c mice. Total counts at each sampling time are indicated as log n° cells/g

| Intestinal microbial groups                             | Control             |                     | <i>B. animalis</i> subsp.<br><i>lactis</i><br>fresh |                    | <i>B. animalis</i> subsp. <i>lactis</i><br>lyophilized |                     | <i>L. gasseri</i><br>fresh |                    |
|---------------------------------------------------------|---------------------|---------------------|-----------------------------------------------------|--------------------|--------------------------------------------------------|---------------------|----------------------------|--------------------|
|                                                         | 0 days              | 8 days              | 0 days                                              | 8 days             | 0 days                                                 | 8 days              | 0 days                     | 8 days             |
|                                                         |                     |                     |                                                     |                    |                                                        |                     |                            |                    |
| <i>Bacteroides-Prevotella-<br/>Phorphyromonas</i> group | 77.620 $\pm$ 11.895 | 77.709 $\pm$ 19.905 | 60.747 $\pm$ 4.680                                  | 52.218 $\pm$ 8.685 | 78.480 $\pm$ 9.499                                     | 65.675 $\pm$ 15.705 | 62.230 $\pm$ 9.409         | 53.181 $\pm$ 4.215 |
| <i>Bifidobacterium</i>                                  | 0.634 $\pm$ 0.105   | 0.875 $\pm$ 0.468   | 0.325 $\pm$ 0.044                                   | 0.355 $\pm$ 0.108  | 0.651 $\pm$ 0.202                                      | 0.947 $\pm$ 0.679   | 0.455 $\pm$ 0.107          | 0.598 $\pm$ 0.166  |
| <i>Lactobacillus-Weisella</i> group                     | 0.899 $\pm$ 0.666   | 0.527 $\pm$ 0.681   | 0.286 $\pm$ 0.286                                   | 0.436 $\pm$ 0.518  | 0.478 $\pm$ 0.278                                      | 1.123 $\pm$ 0.505   | 0.139 $\pm$ 0.074          | 0.414 $\pm$ 0.305  |
| Enterobacteriaceae                                      | 0.007 $\pm$ 0.003   | 0.026 $\pm$ 0.018   | 0.003 $\pm$ 0.001                                   | 0.007 $\pm$ 0.005  | 0.003 $\pm$ 0.001                                      | 0.005 $\pm$ 0.003   | 0.005 $\pm$ 0.003          | 0.003 $\pm$ 0.002  |
| <i>Clostridium</i> cluster XIVa                         | 1.145 $\pm$ 0.633   | 2.404 $\pm$ 1.106   | 0.702 $\pm$ 0.484                                   | 0.382 $\pm$ 0.331  | 1.053 $\pm$ 0.357                                      | 1.182 $\pm$ 1.534   | 0.502 $\pm$ 0.188          | 0.414 $\pm$ 0.073  |
| Others                                                  | 19.694 $\pm$ 12.904 | 18.459 $\pm$ 21.658 | 37.937 $\pm$ 4.699                                  | 46.602 $\pm$ 9.022 | 19.335 $\pm$ 9.966                                     | 31.070 $\pm$ 18.237 | 36.669 $\pm$ 9.641         | 45.473 $\pm$ 4.354 |
| Total counts                                            | 11.216 $\pm$ 0.244  | 10.975 $\pm$ 0.381  | 11.463 $\pm$ 0.156                                  | 11.534 $\pm$ 0.094 | 11.438 $\pm$ 0.121                                     | 11.250 $\pm$ 0.238  | 11.505 $\pm$ 0.069         | 11.433 $\pm$ 0.087 |

**Table S2.** Molar proportions of the major SCFA (acetate, propionate, and butyrate), calculated as a percentage of the total SCFA (sum of concentrations of the three major SCFA expressed in mM) at time 0 and after eight days of daily administration of *B. animalis* subsp. *lactis* IPLA 20020 (fresh culture or lyophilized) or *L. gasseri* IPLA 20212 (fresh culture), and a placebo (control) to adult BALB/c mice. Ratios between some SCFA are also indicated.

| Intestinal SCFA  | Control       |               | <i>B. animalis</i> subsp. <i>lactis</i><br>fresh |                | <i>B. animalis</i> subsp. <i>lactis</i><br>lyophilized |                | <i>L. gasseri</i><br>fresh |                |
|------------------|---------------|---------------|--------------------------------------------------|----------------|--------------------------------------------------------|----------------|----------------------------|----------------|
|                  | 0 days        | 8 days        | 0 days                                           | 8 days         | 0 days                                                 | 8 days         | 0 days                     | 8 days         |
|                  |               |               |                                                  |                |                                                        |                |                            |                |
| Acetic acid      | 76.35 ± 2.09  | 78.08 ± 2.48  | 75.37 ± 3.79                                     | 70.47 ± 3.83   | 75.55 ± 1.09                                           | 72.96 ± 3.43   | 73.15 ± 1.99               | 72.12 ± 3.31   |
| Propionic acid   | 15.15 ± 2.01  | 14.22 ± 1.16  | 12.58 ± 1.75                                     | 12.84 ± 1.1    | 14.08 ± 0.76                                           | 13.59 ± 1.46   | 13.3 ± 2.51                | 14.81 ± 1.32   |
| Butyric acid     | 8.5 ± 1.49    | 7.7 ± 1.63    | 12.05 ± 2.46                                     | 16.68 ± 4.27   | 10.38 ± 1.18                                           | 13.45 ± 3.77   | 13.56 ± 2.16               | 13.07 ± 2.44   |
| Acetic/Propionic | 5.11 ± 0.69   | 5.53 ± 0.63   | 5.69 ± 0.71                                      | 5.52 ± 0.49    | 5.38 ± 0.31                                            | 5.41 ± 0.6     | 5.68 ± 1.22                | 4.91 ± 0.63    |
| Acetic/Butyric   | 9.27 ± 2.06   | 10.53 ± 2.23  | 6.52 ± 1.61                                      | 4.58 ± 1.77    | 7.36 ± 0.86                                            | 5.81 ± 1.77    | 5.54 ± 1.12                | 5.72 ± 1.38    |
| Total SCFA (mM)  | 95.56 ± 23.53 | 66.99 ± 23.07 | 131.27 ± 36.30                                   | 109.54 ± 26.68 | 128.13 ± 23.53                                         | 112.40 ± 30.74 | 156.04 ± 26.72             | 137.72 ± 32.20 |
